# Supplementary material for: Bovine ticks harbour a diverse array of microorganisms in Pakistan
Source: Springer Nature journal article supplement (doi:10.1186/s13071-019-3862-4), 2020-01-03
Supplement: MOESM1 [file 13071_2019_3862_MOESM1_ESM.pdf]

**Additional file 1: Table S1** Primers used for validation of microfluidic real-time PCR results

| Species                                              | Target gene      | Forward primer            | Reverse primer         | Reference |
|------------------------------------------------------|------------------|---------------------------|------------------------|-----------|
| <i>Babesia/Theileria</i>                             | 18S rRNA         | GAGGTAGTGACAAGAAATAACAATA | TCTTCGATCCCCTAACTTTC   | [1]       |
| <i>Anaplasma/<br/>Ehrlichia/<br/>Rickettsia</i> spp. | 16S rRNA         | GAACGAACGCTGGCGGCAAGC     | AGTAYCGRACCAGATAGC CGC | [2]       |
|                                                      | Citrate synthase | GGGGGCCTGCTCACGGCGG       | ATTGCAAAAAGTACAGTGAAC  | [3]       |
| <i>Hepatozoon</i> spp.                               | 18S rRNA         | ATACATGAGCAAAATCTCAAC     | CTTATTATTCCATGCTGCAG   | [4]       |
| <i>Bartonella</i> spp.                               | Citrate synthase | GGGGACCAGCTCATGGTGG       | AATGCAAAAAGAACAGTAAACA | [5]       |

**References**

1. Gubbels J, De Vos A, Van der Weide M, Viseras J, Schouls L, De Vries E, et al. Simultaneous detection of bovine *Theileria* and *Babesia* species by reverse line blot hybridization. J Clin Microbio. 1999;37:1782-9.
2. Rar VA, Fomenko NV, Dobrotvorsky AK, Livanova NN, Rudakova SA, Fedorov EG, et al. Tickborne pathogen detection, western Siberia, Russia. Emerg Infect Dis. 2005;11:1708.
3. Regnery RL, Spruill CL, Plikaytis B. Genotypic identification of *Rickettsiae* and estimation of intraspecies sequence divergence for portions of two rickettsial genes. J Bacteriol. 1991;173:1576-89.
4. de Azevedo Gomes L, Moraes PHG, do Nascimento LdCS, O'Dwyer LH, Nunes MRT, Rossi AdRP, et al. Molecular analysis reveals the diversity of *Hepatozoon* species naturally infecting domestic dogs in a northern region of Brazil. Ticks Tick Borne Dis. 2016;7:1061-6.
5. Norman A, Regnery R, Jameson P, Greene C, Krause D. Differentiation of *Bartonella*-like isolates at the species level by PCR-restriction fragment length polymorphism in the citrate synthase gene. J Clin Microbiol. 1995;33:1797-803.
