# Supplementary figures and images for: Bovine ticks harbour a diverse array of microorganisms in Pakistan
Source: Springer Nature journal article supplement (doi:10.1186/s13071-019-3862-4), 2020-01-03

## Additional File 2

### Figure S1

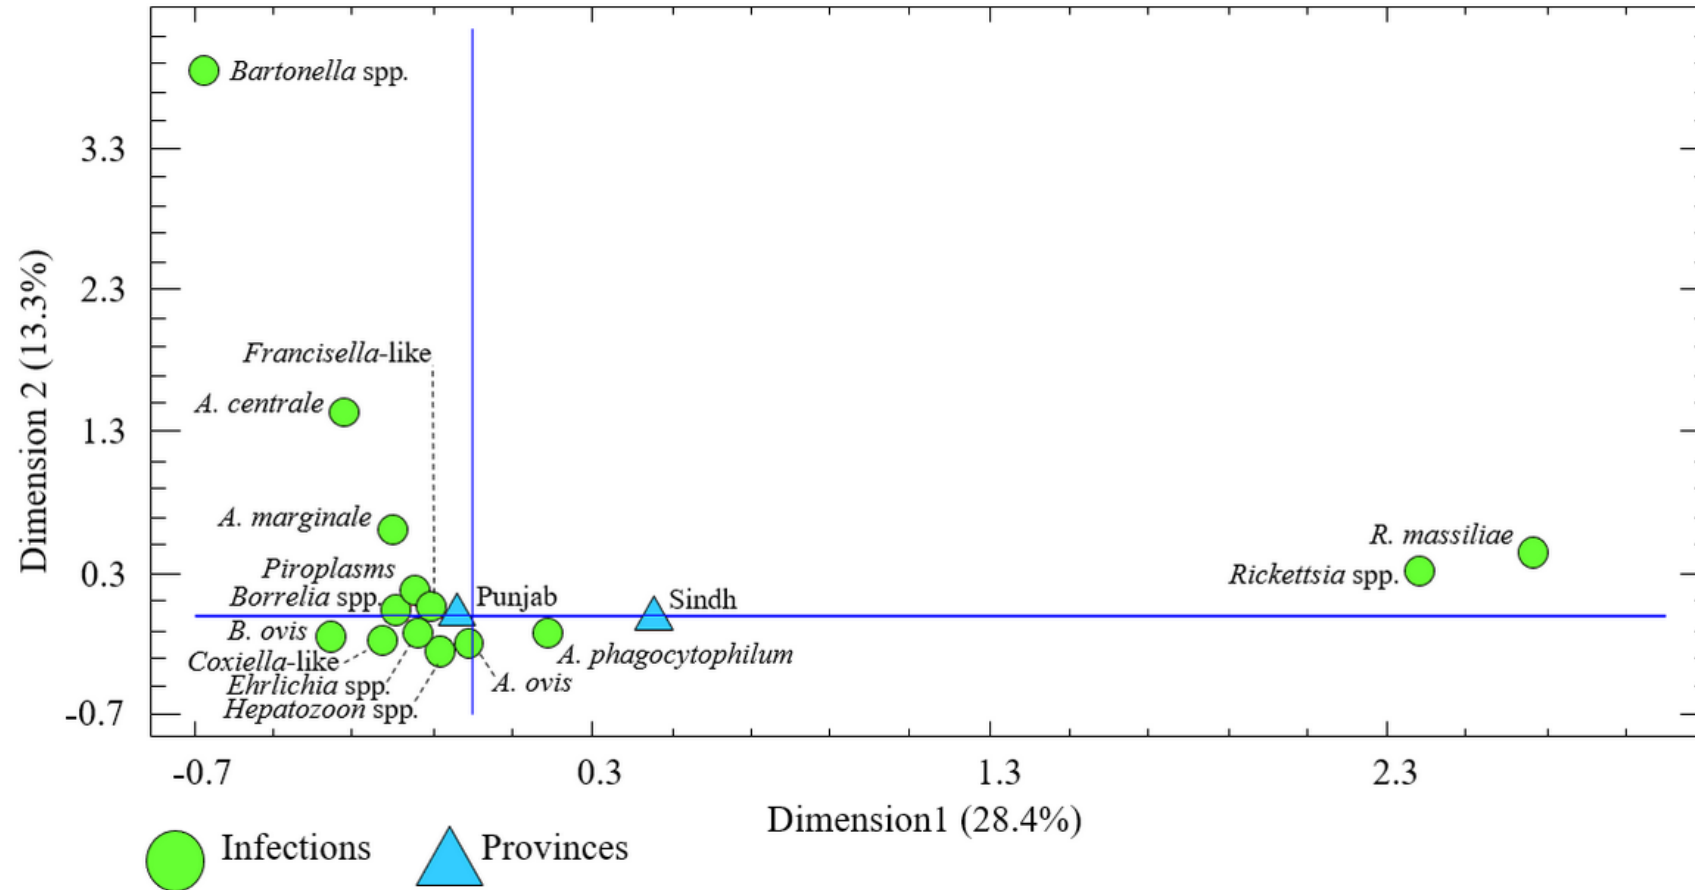

Supplement: MOESM2 [file 13071_2019_3862_MOESM2_ESM.pdf]

# Additional File 3

## Figure S2

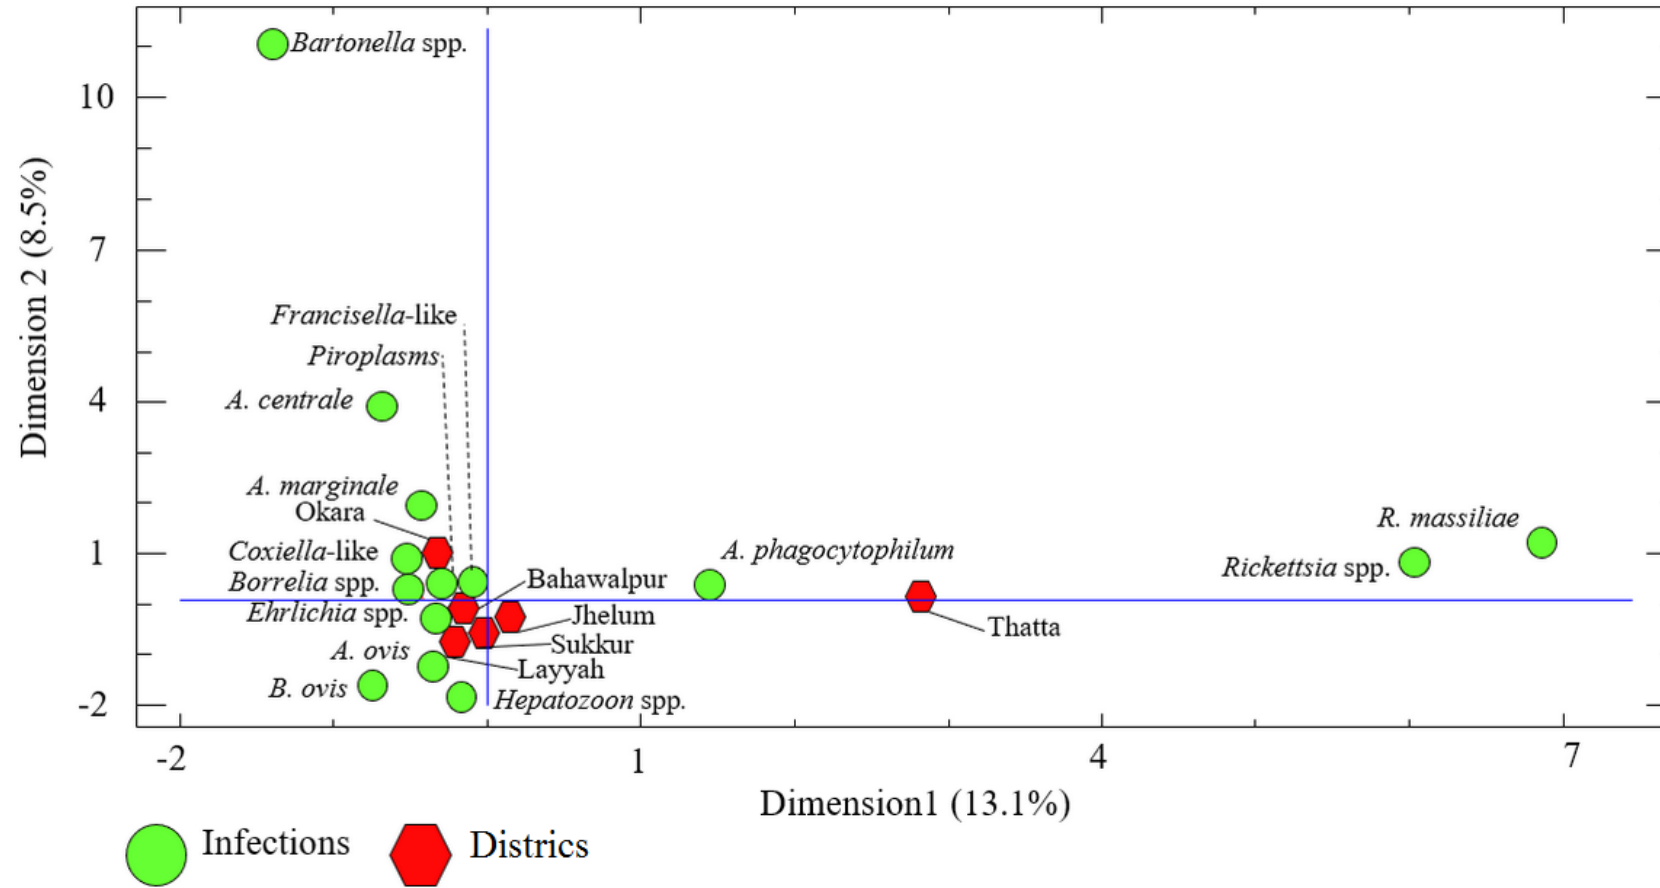

Supplement: MOESM3 [file 13071_2019_3862_MOESM3_ESM.pdf]

# Additional File 4

## Figure S3

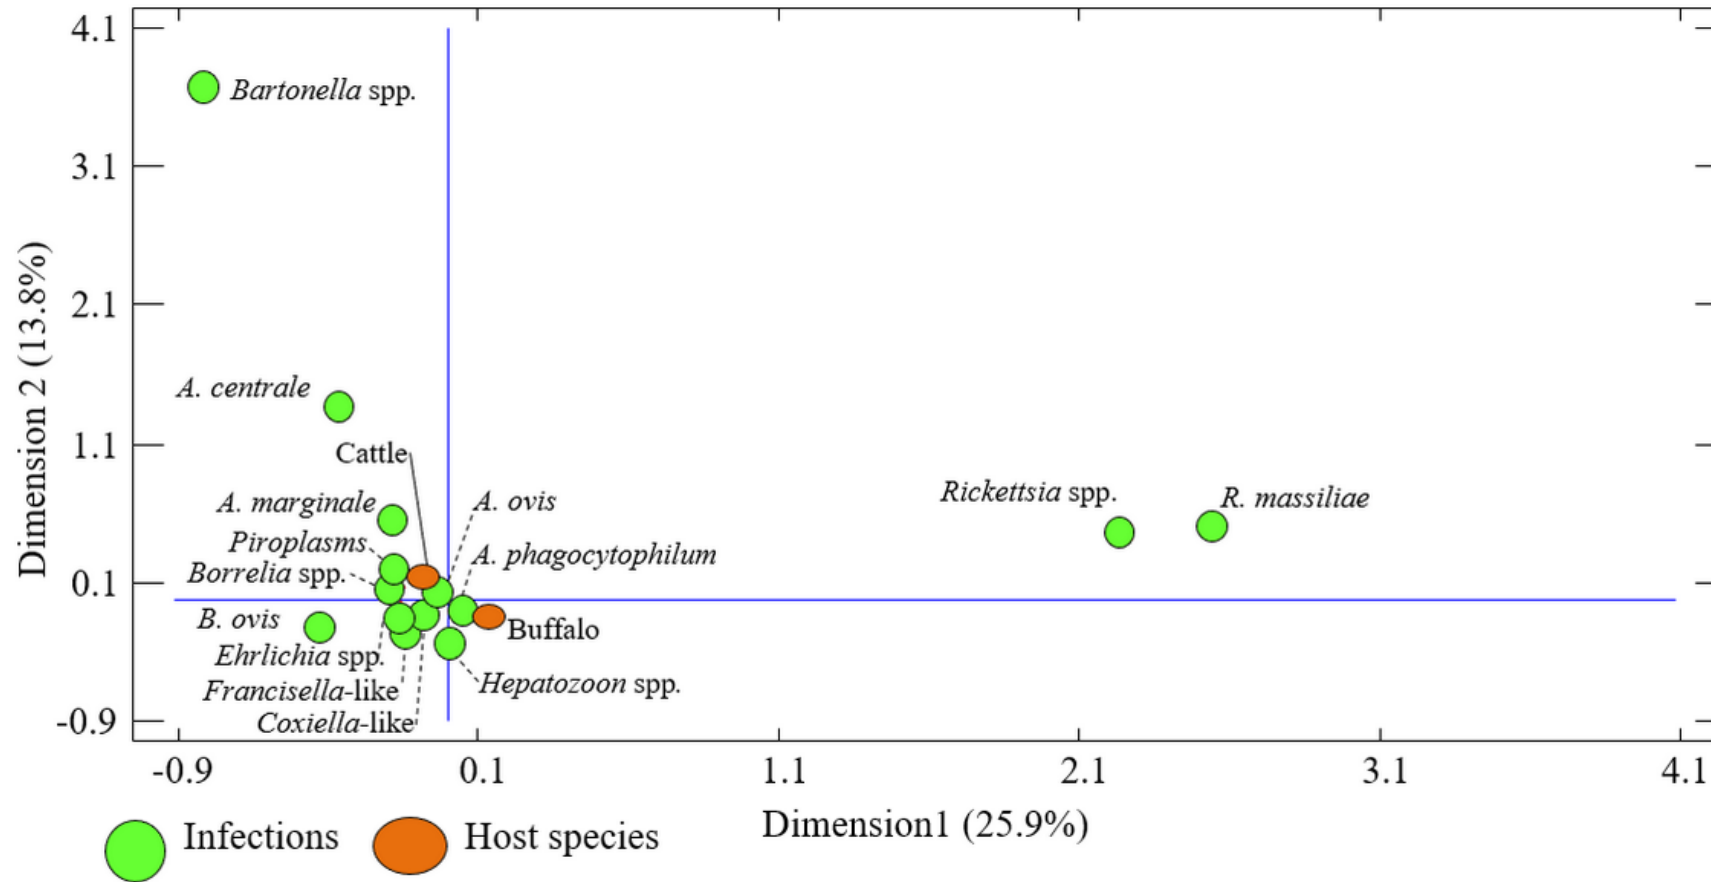

Supplement: MOESM4 [file 13071_2019_3862_MOESM4_ESM.pdf]
